# Supplementary material
Source: Springer Nature journal article supplement (https://www.springermedizin.de/resource/supplementary/12984_2009_224_MOESM7_ESM.pdf/9605562)

Kruskal-Wallis, influence of features for PROPRIO

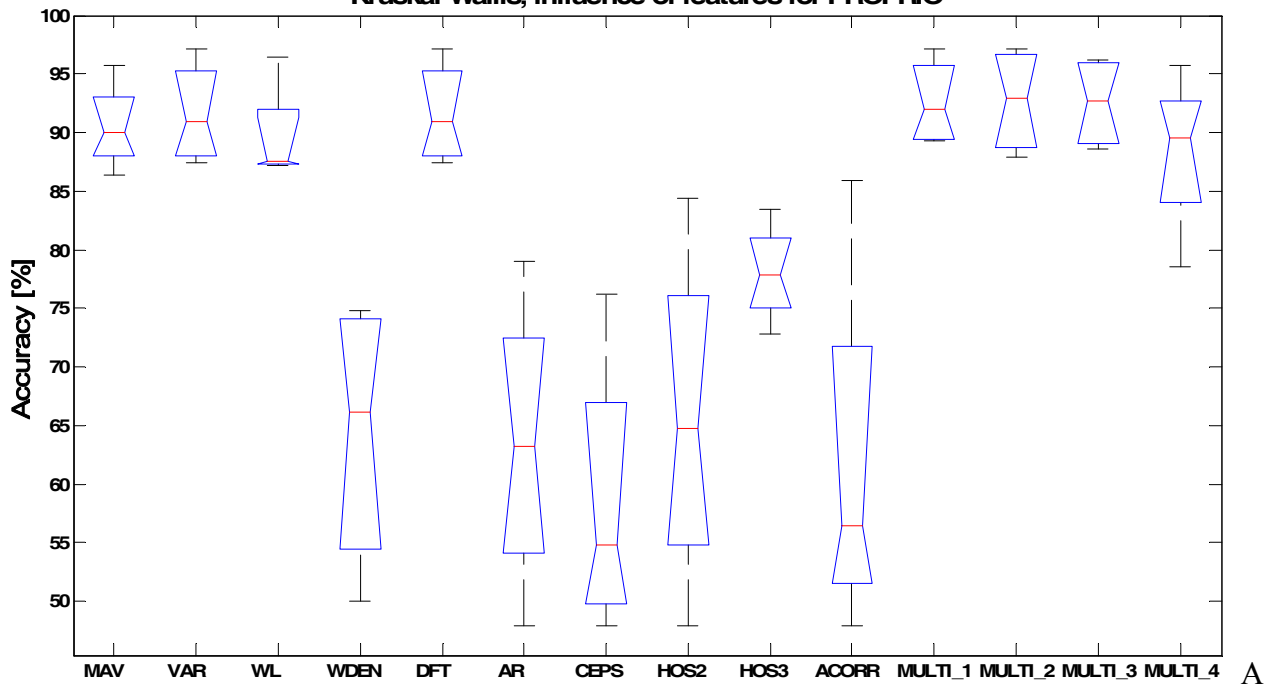

Kruskal-Wallis, influence of features for VF vs PROPRIO vs rest

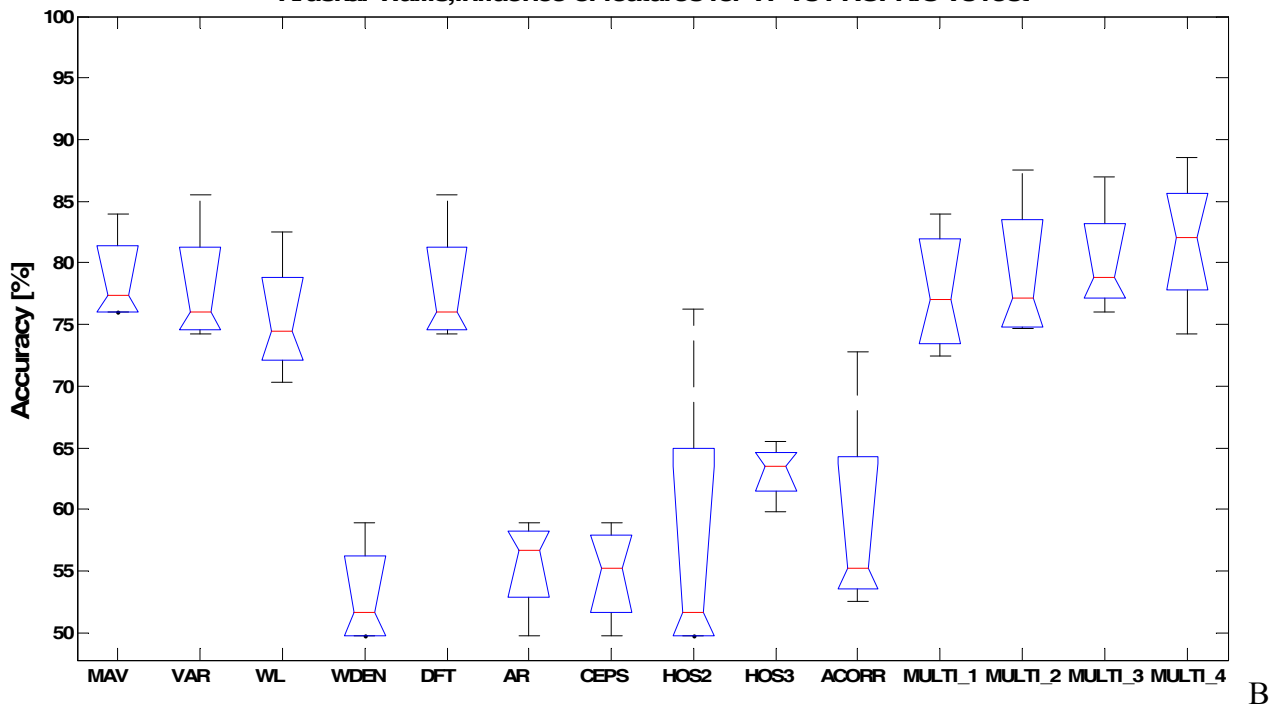

Supplement: MOESM7 [file 9605562]
